# Supplementary material for: Modeling global radiative effect of brown carbon: A larger heating source in the tropical free troposphere than black carbon
Source: Copernicus journal article supplement (doi:10.5194/acp-2019-594), 2019-07-02
Supplement: Supplementary file 1 [file acp-2019-594-supplement.pdf]

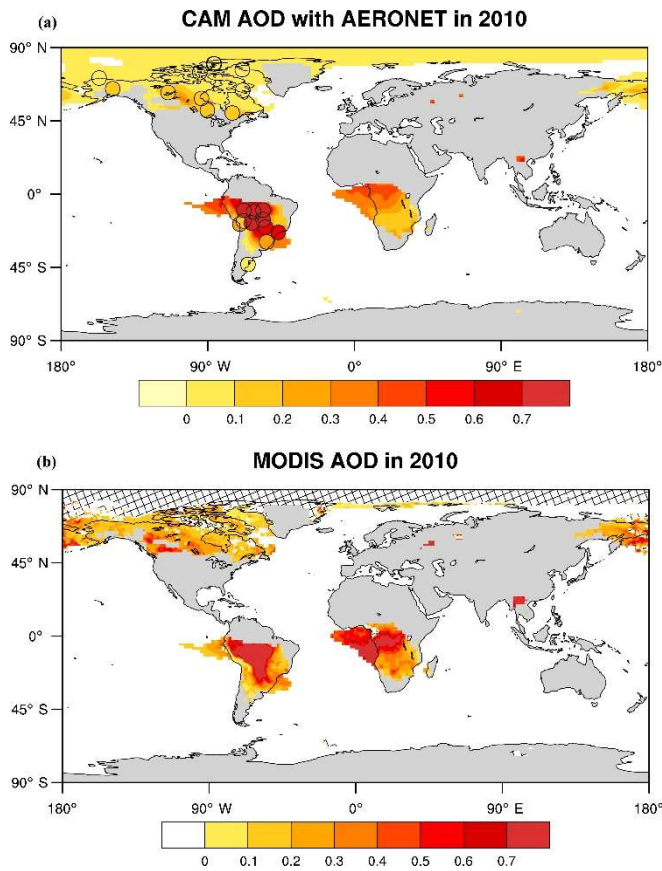

**Figure S1.** Simulated (a) and MODIS observed (b) 550 nm AOD data averaged for the months and regions in which fire emissions account for < 50% of the total AOD for 2010. AERONET measurements in the corresponding months and regions are shown as color-coded open circles in (a). MODIS data in the shaded Arctic region in (b) are not used due to the uncertainty of MODIS retrieval above bright surface (Remer et al., 2013).

10

15

**Table S1a. RRTMG wavelength boundaries for shortwave**

| Band Index | Lower boundary Wavelength (nm) | Upper Boundary Wavelength (nm) |
|------------|--------------------------------|--------------------------------|
| 1          | 3077                           | 3846                           |
| 2          | 2500                           | 3077                           |
| 3          | 2150                           | 2500                           |
| 4          | 1942                           | 2150                           |
| 5          | 1626                           | 1942                           |
| 6          | 1299                           | 1626                           |
| 7          | 1242                           | 1299                           |
| 8          | 778                            | 1242                           |
| 9          | 625                            | 778                            |
| 10         | 442                            | 625                            |
| 11         | 345                            | 442                            |
| 12         | 263                            | 345                            |
| 13         | 200                            | 263                            |

20

25

35 **Table S1b. RRTMG wavelength boundaries for longwave**

| Band Index | Lower boundary Wavelength ( $\mu\text{m}$ ) | Upper Boundary Wavelength ( $\mu\text{m}$ ) |
|------------|---------------------------------------------|---------------------------------------------|
| 1          | 28.57                                       | 1000                                        |
| 2          | 20                                          | 28.57                                       |
| 3          | 15.87                                       | 20                                          |
| 4          | 14.29                                       | 15.87                                       |
| 5          | 12.2                                        | 14.29                                       |
| 6          | 10.2                                        | 12.2                                        |
| 7          | 9.26                                        | 10.2                                        |
| 8          | 8.47                                        | 9.26                                        |
| 9          | 7.19                                        | 8.47                                        |
| 10         | 6.76                                        | 7.19                                        |
| 11         | 5.56                                        | 6.76                                        |
| 12         | 4.81                                        | 5.56                                        |
| 13         | 4.44                                        | 4.81                                        |
| 14         | 4.2                                         | 4.44                                        |
| 15         | 3.85                                        | 4.2                                         |
| 16         | 3.08                                        | 3.85                                        |

**Reference**

Remer, L., Mattoo, S., Levy, R., and Munchak, L.: MODIS 3 km aerosol product: algorithm and global perspective, Atmospheric Measurement Techniques, 6, 1829, 2013.

45
