# Supplementary material for: Modeling global radiative effect of brown carbon: A larger heating source in the tropical free troposphere than black carbon
Source: Copernicus journal article supplement (doi:10.5194/acp-2019-594), 2019-07-02
Supplement: Supplementary file [file acp-2019-594-AC6-supplement.pdf]

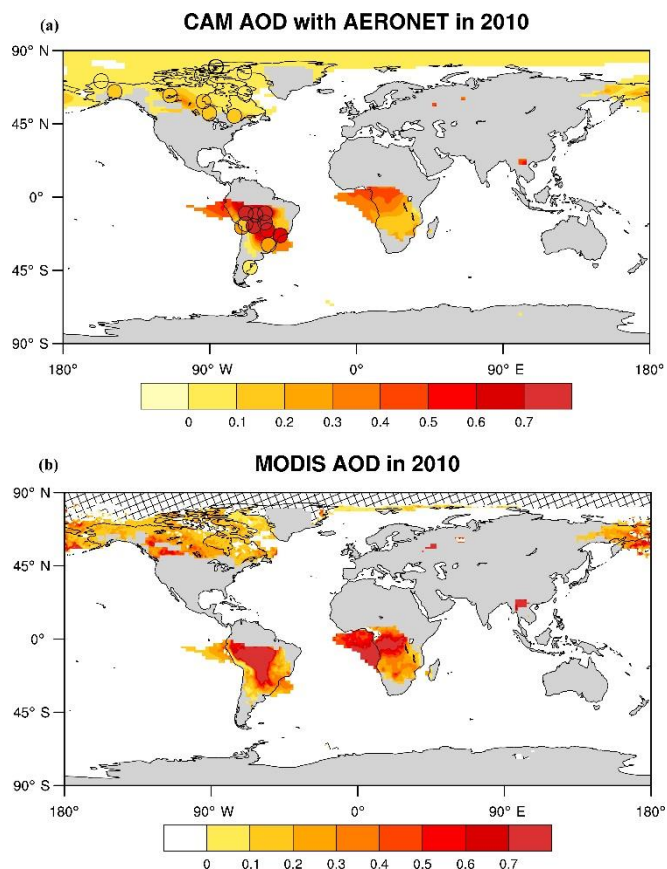

**Figure S1.** Simulated (a) and MODIS observed (b) 550 nm AOD data averaged for the months and regions in which fire emissions account for < 50% of the total AOD for 2010. AERONET measurements in the corresponding months and regions are shown as color-coded open circles in (a). MODIS data in the shaded Arctic region in (b) are not used due to the

5 uncertainty of MODIS retrieval above bright surface (Remer et al., 2013).

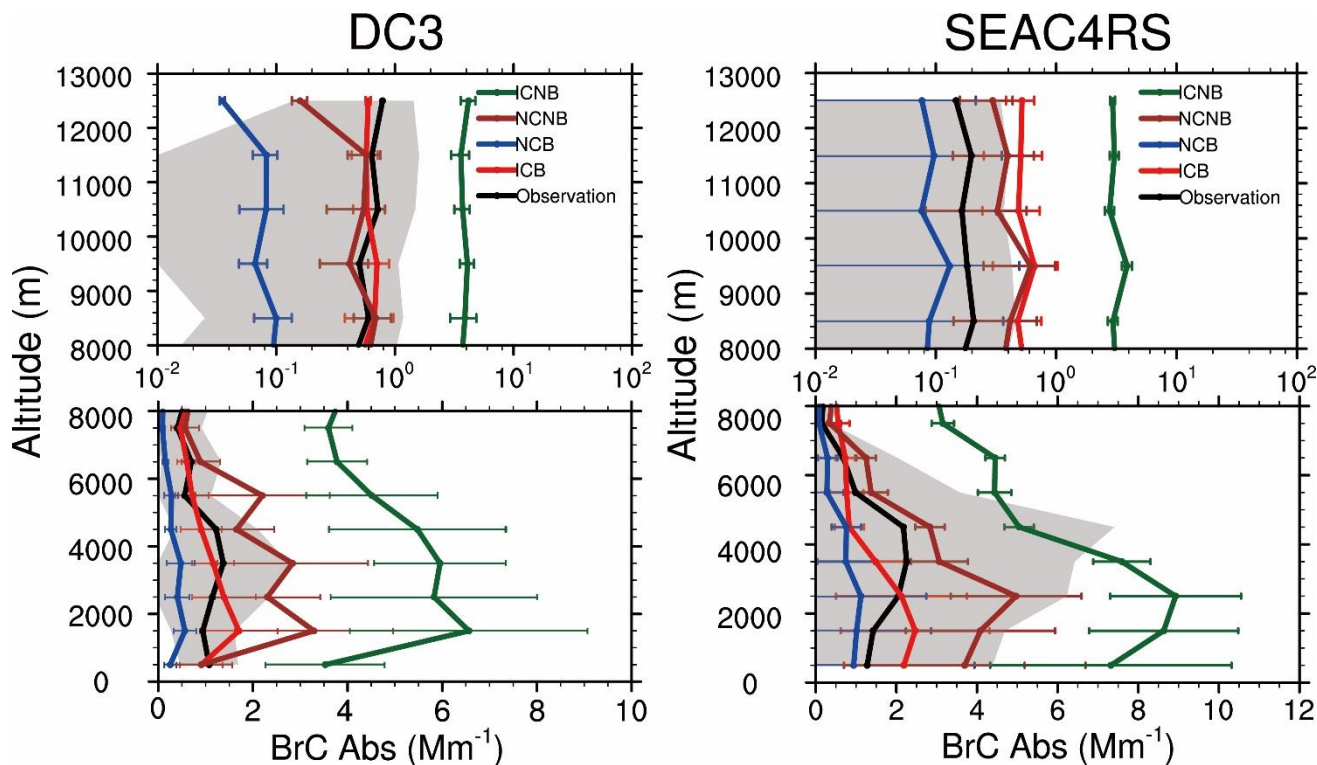

**Figure S2.** Comparison between observed and simulated vertical profiles of BrC absorption at 365 nm. Black lines and shaded areas show the means and standard deviations of the observations binned in 1-km intervals, respectively. The colored vertical lines and horizontal bars show the means and standard deviations of corresponding model results, respectively. Model sensitivity simulations of BrC are listed in Table 2.

10

15

**Table S1a.** RRTMG wavelength boundaries for shortwave

| Band Index | Lower boundary Wavelength (nm) | Upper Boundary Wavelength (nm) |
|------------|--------------------------------|--------------------------------|
| 1          | 3077                           | 3846                           |
| 2          | 2500                           | 3077                           |
| 3          | 2150                           | 2500                           |
| 4          | 1942                           | 2150                           |

|    |      |      |
|----|------|------|
| 5  | 1626 | 1942 |
| 6  | 1299 | 1626 |
| 7  | 1242 | 1299 |
| 8  | 778  | 1242 |
| 9  | 625  | 778  |
| 10 | 442  | 625  |
| 11 | 345  | 442  |
| 12 | 263  | 345  |
| 13 | 200  | 263  |

20

25

30

35

**Table S1b. RRTMG wavelength boundaries for longwave**

| Band Index | Lower boundary Wavelength ( $\mu\text{m}$ ) | Upper Boundary Wavelength ( $\mu\text{m}$ ) |
|------------|---------------------------------------------|---------------------------------------------|
| 1          | 28.57                                       | 1000                                        |
| 2          | 20                                          | 28.57                                       |
| 3          | 15.87                                       | 20                                          |
| 4          | 14.29                                       | 15.87                                       |
| 5          | 12.2                                        | 14.29                                       |
| 6          | 10.2                                        | 12.2                                        |
| 7          | 9.26                                        | 10.2                                        |
| 8          | 8.47                                        | 9.26                                        |
| 9          | 7.19                                        | 8.47                                        |
| 10         | 6.76                                        | 7.19                                        |
| 11         | 5.56                                        | 6.76                                        |
| 12         | 4.81                                        | 5.56                                        |
| 13         | 4.44                                        | 4.81                                        |
| 14         | 4.2                                         | 4.44                                        |
| 15         | 3.85                                        | 4.2                                         |
| 16         | 3.08                                        | 3.85                                        |

40

45 **Reference**

Remer, L., Mattoo, S., Levy, R., and Munchak, L.: MODIS 3 km aerosol product: algorithm and global perspective, Atmospheric Measurement Techniques, 6, 1829, 2013.

50
